# Supplementary material for: Molecular mapping of urinary complement peptides in kidney diseases
Source: bioRxiv or medRxiv preprint supplement (doi:10.1101/2021.06.24.21259458), 2021-07-12
Supplement: Supplementary file [file media-1.pdf]

# e-Supplement to

## Differential excretion of urinary complement fragments in kidney diseases: a potential link to complement activation?

### Supplementary Figure 1 (part 1-23)

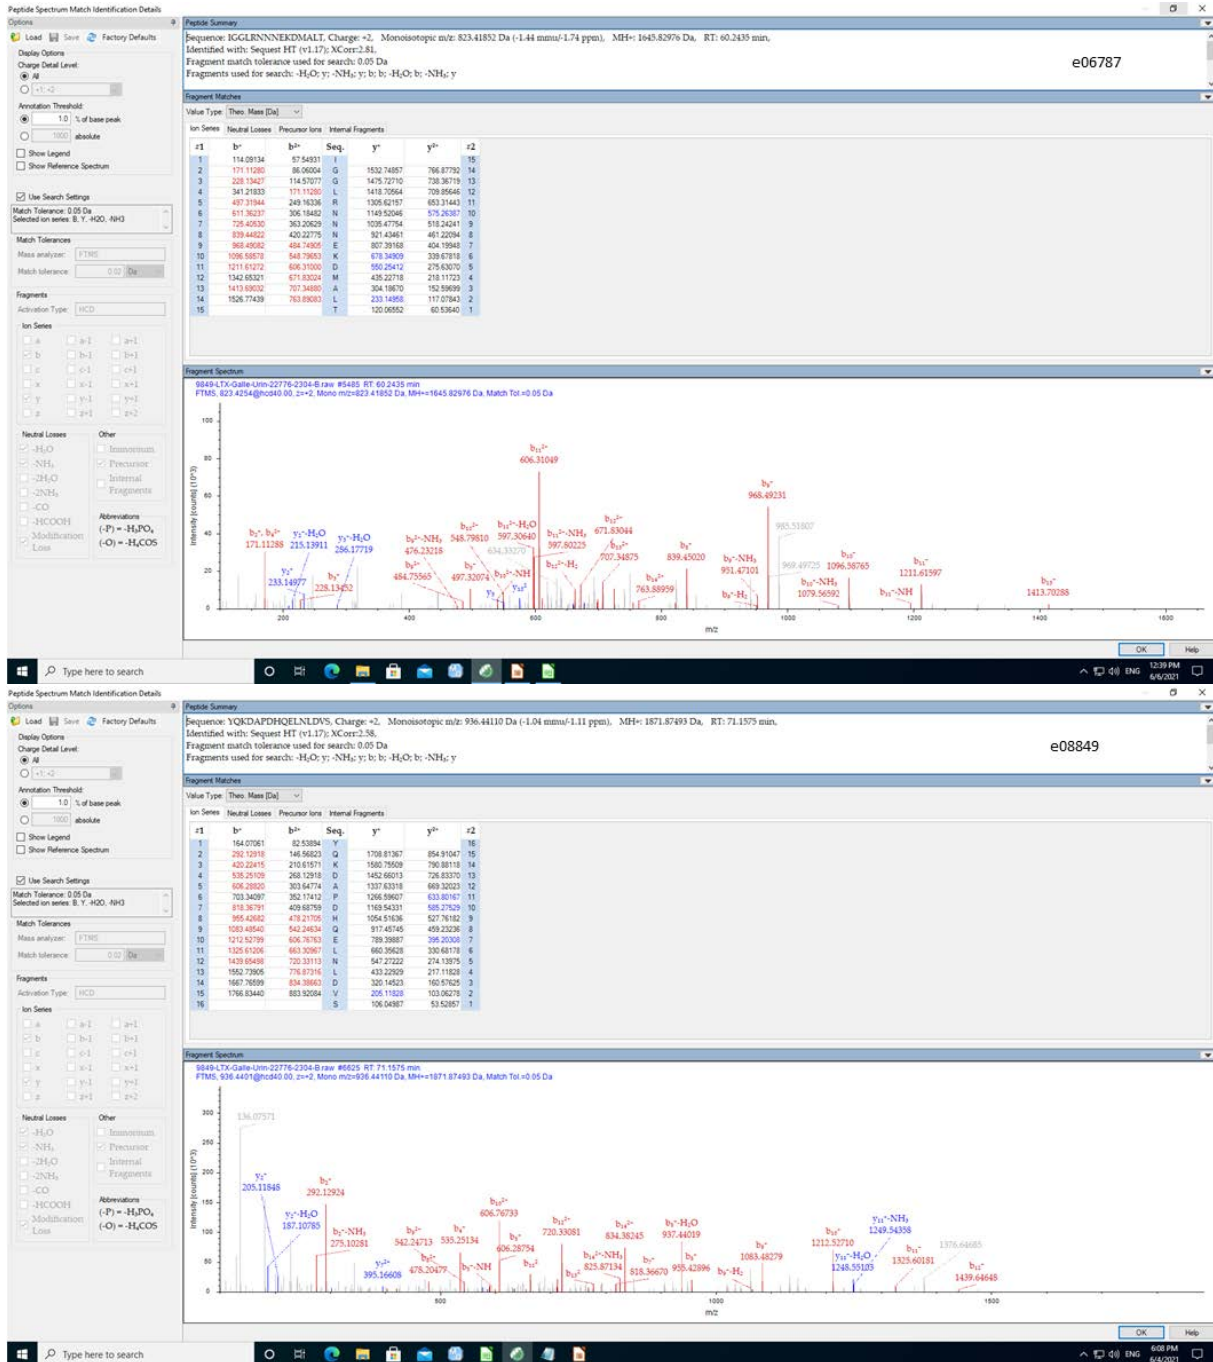

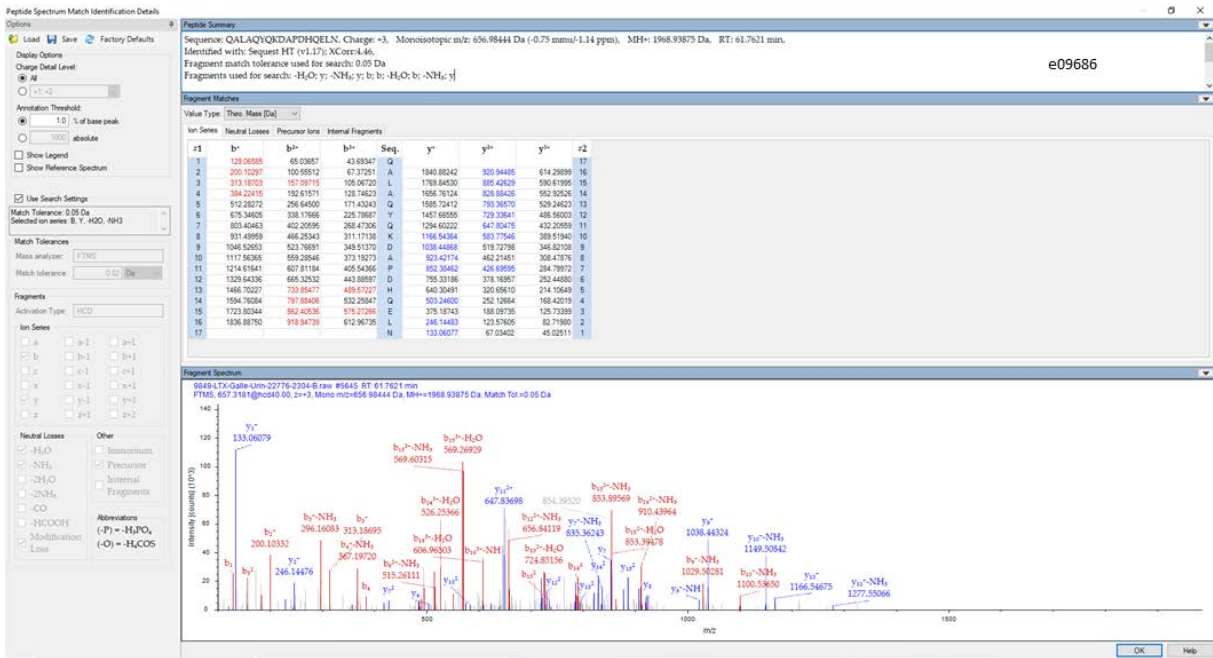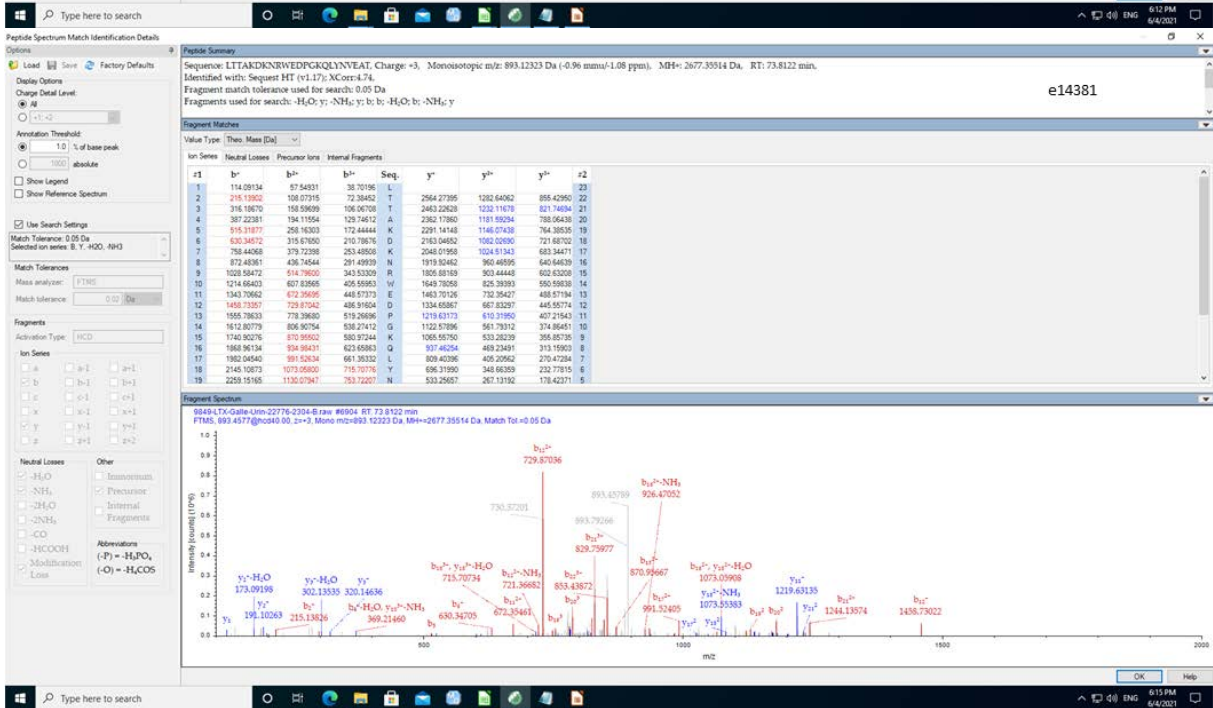

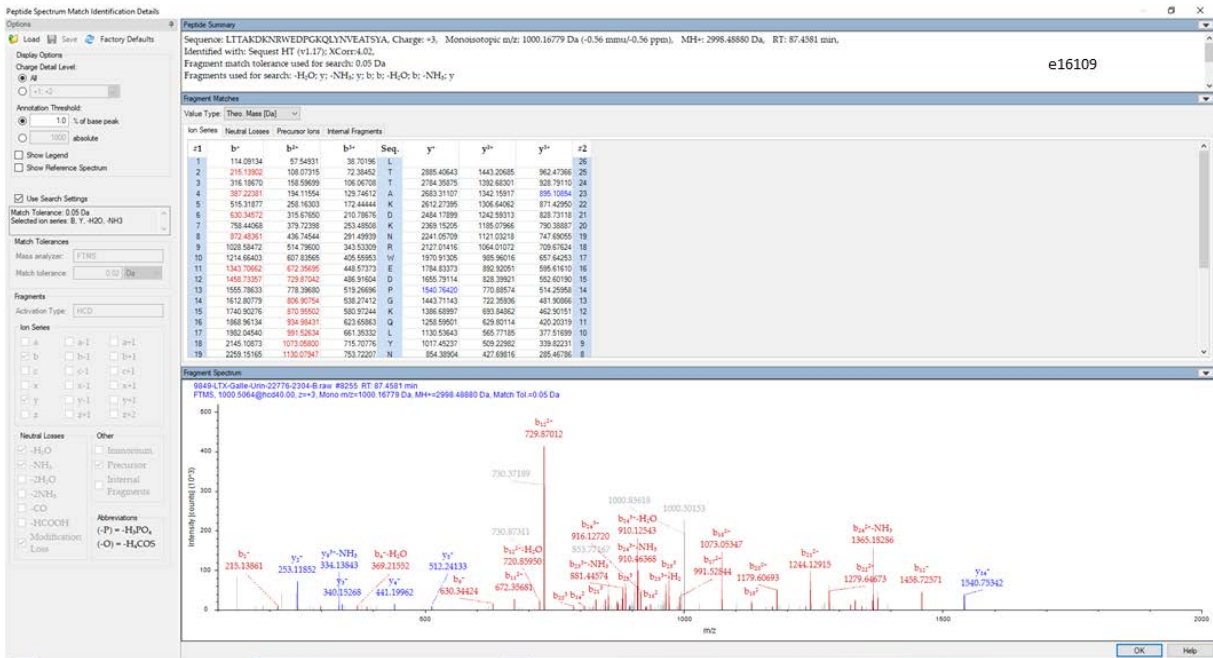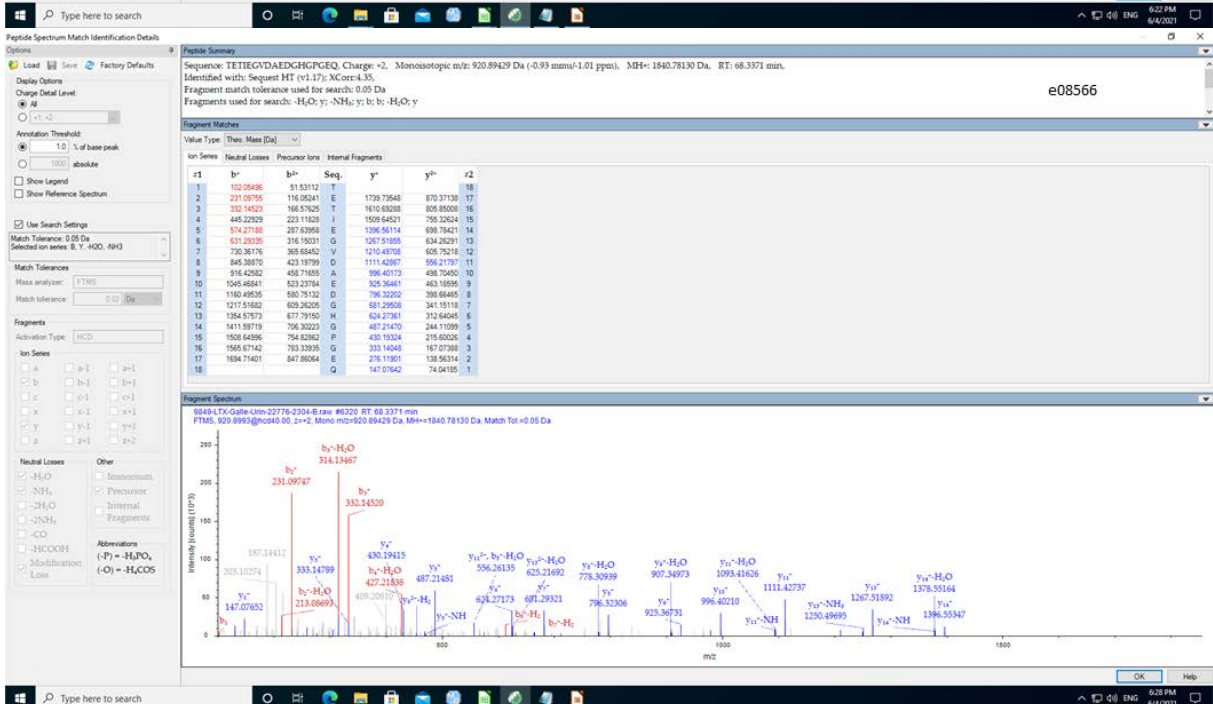

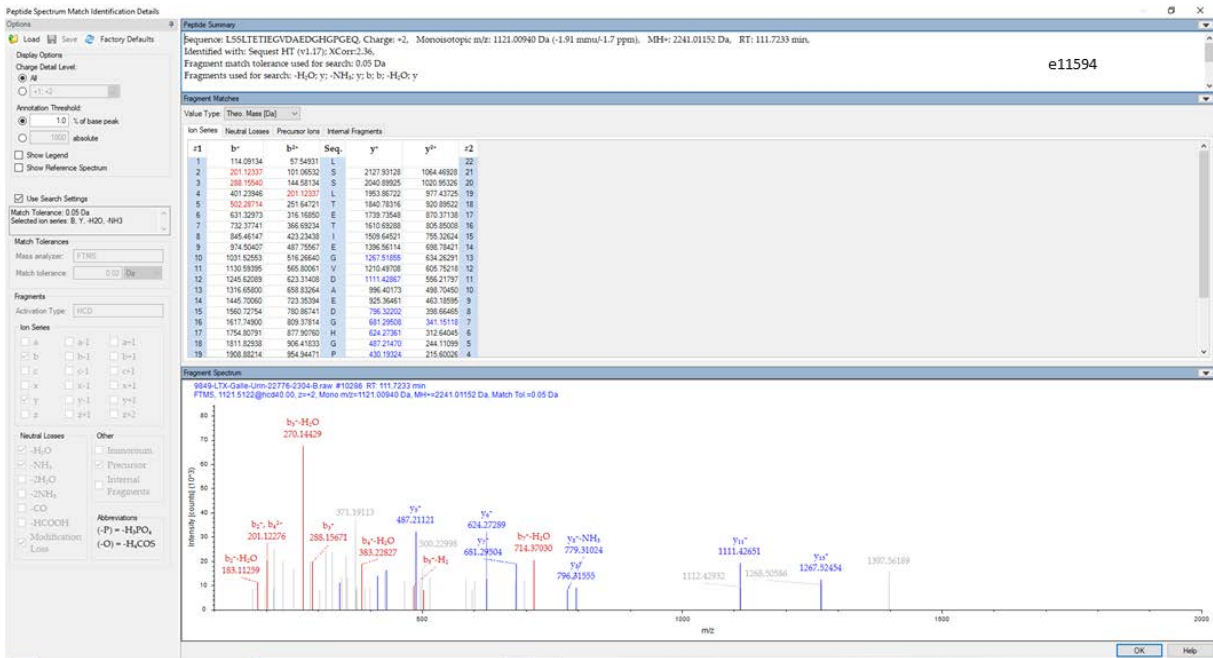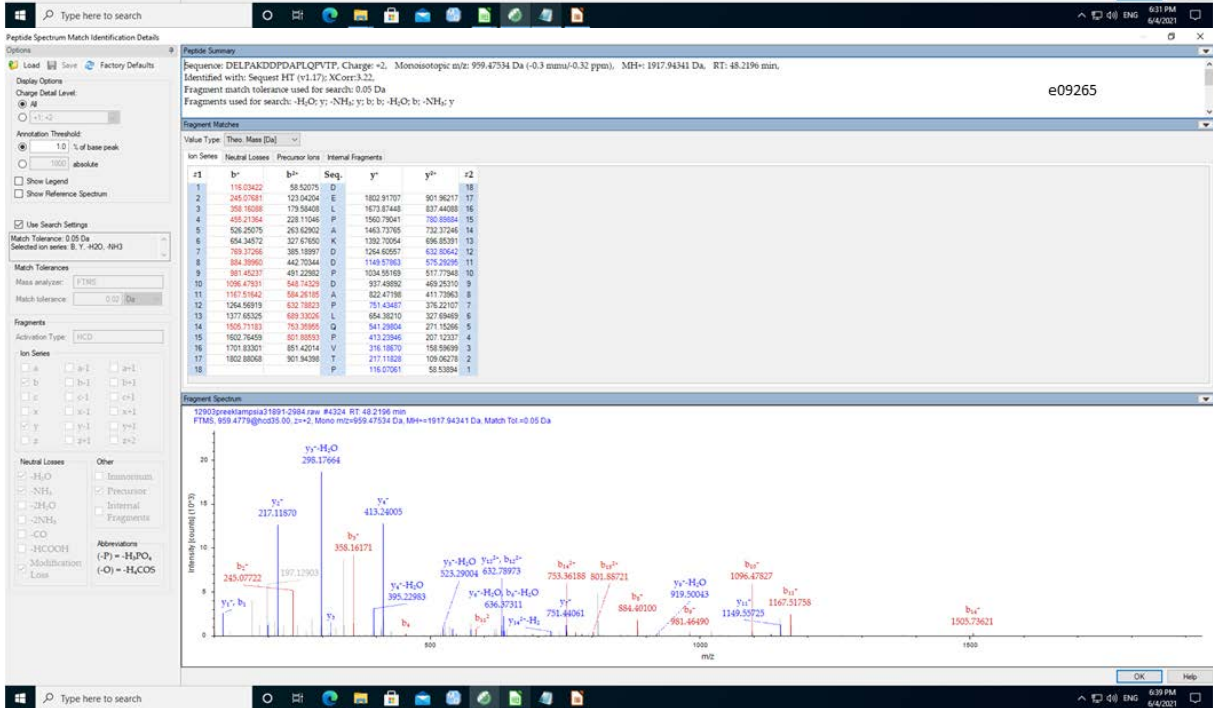



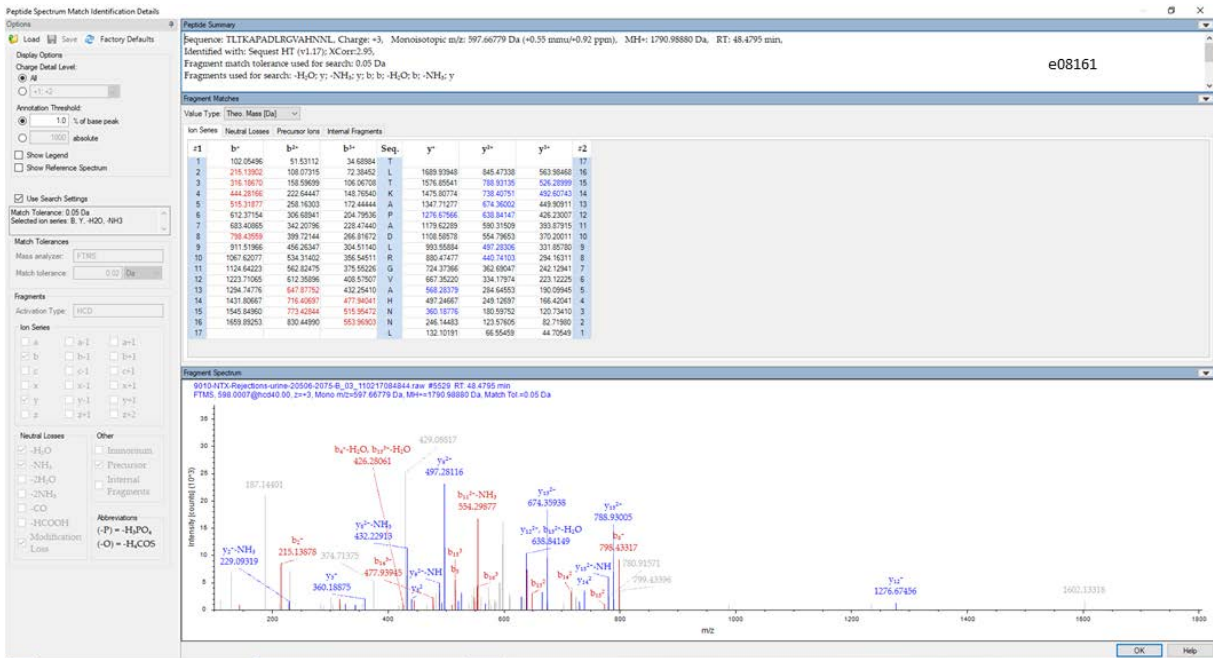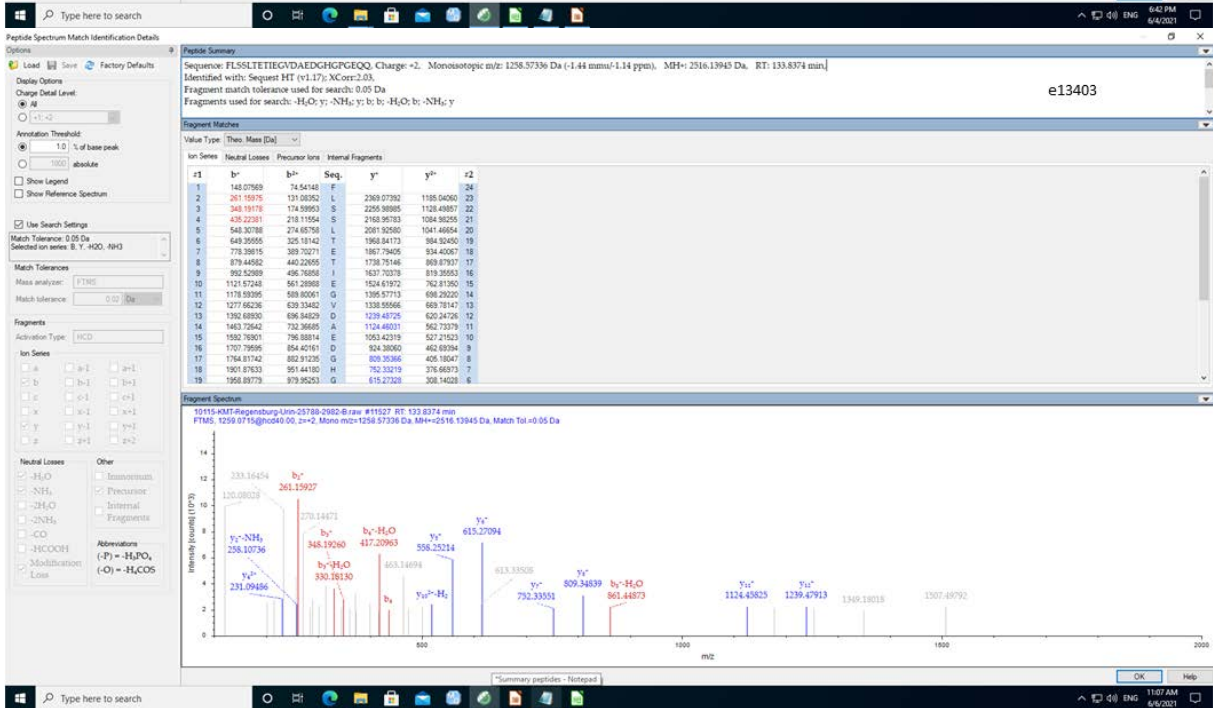

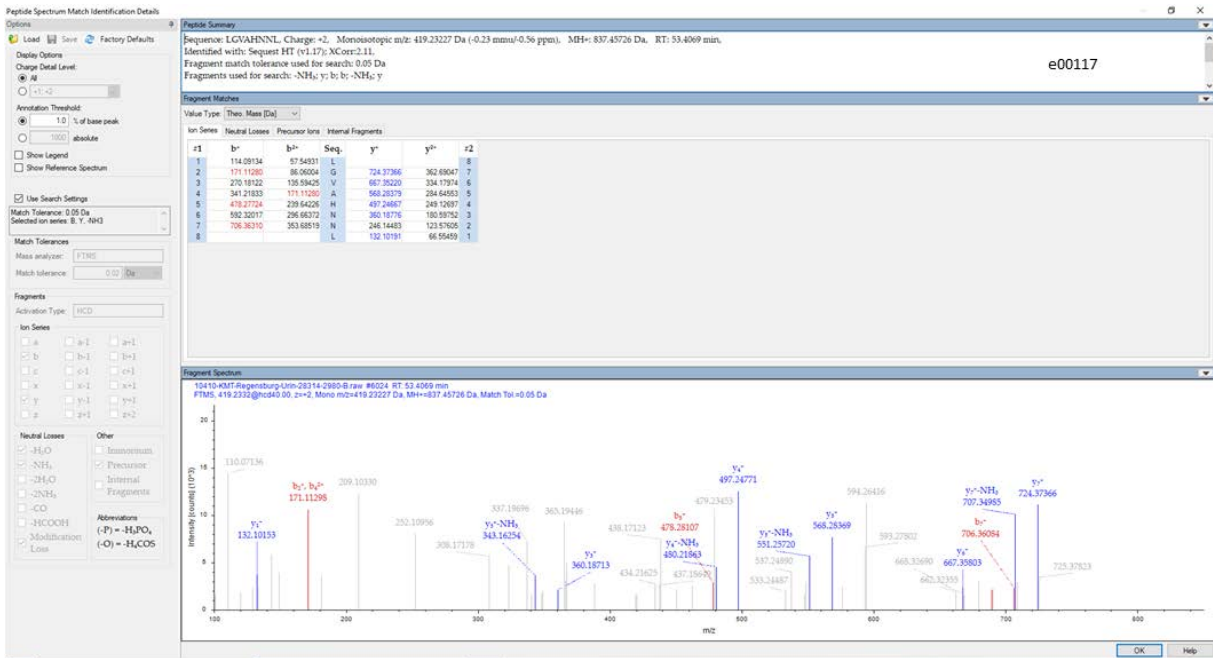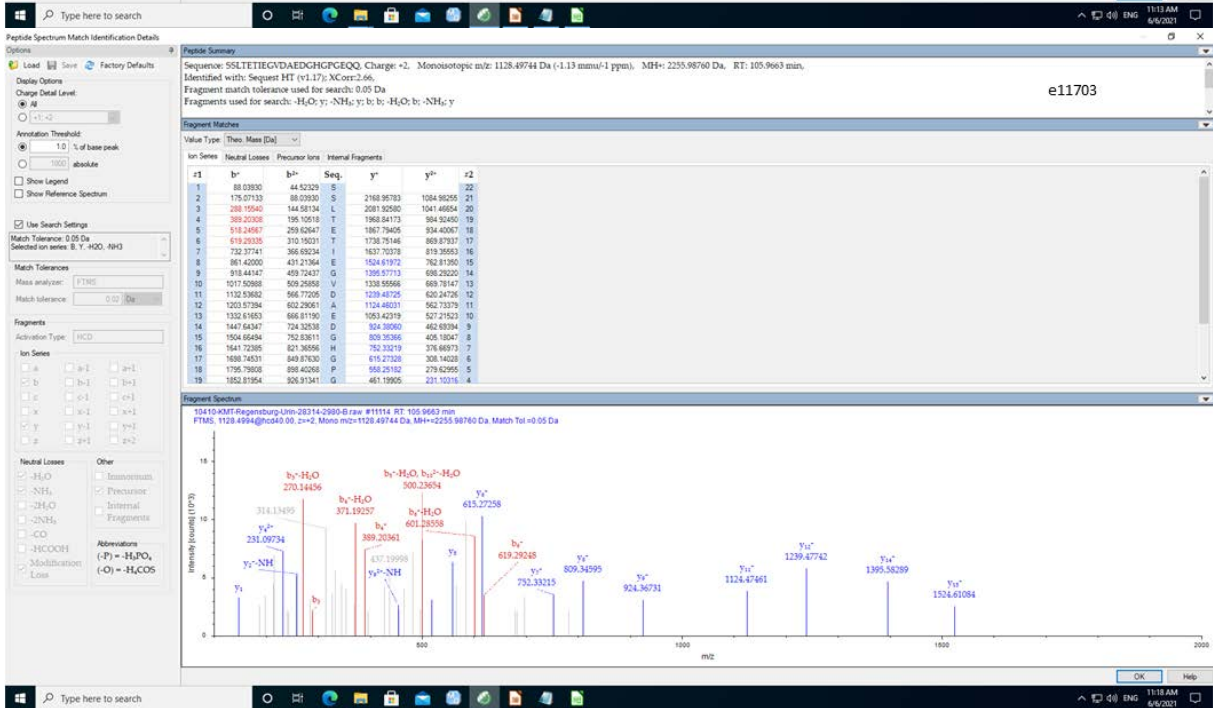

**Peptide Spectrum Match Identification Details**

Options: Load Save Factory Defaults

Display Options: Charge Detail Level: All

Annotation Threshold: 1.0 % of base peak

Match Tolerances: Match Tolerance: 0.05 Da

Mass analysis: FTMS

Match tolerance: 0.02 Da

Fragmentation: Activation Type: HCD

Ion Series: a, b, c, x, y, z

Neutral Losses: H<sub>2</sub>O, NH<sub>3</sub>, 2H<sub>2</sub>O, 2NH<sub>3</sub>, CO, HCOOH, Methylation, Loss

Other: Incomplete, Precursor, Internal, Fragments, Abbreviations: (P) = H<sub>2</sub>PO, (-O) = H<sub>2</sub>CO

**Peptide Summary**

Sequence: **LSLLETEICVDAEDHGPGEOQ**, Charge: +3, Monoisotopic m/z: 790.36224 Da (-0.58 mmu/-0.73 ppm), MH+: 2369.07218 Da, RT: 114.8764 min.

Identified with: **Sequest HT (v1.17); XCorr: 4.38**

Fragment match tolerance used for search: 0.05 Da

Fragments used for search: -H<sub>2</sub>O; y; -NH<sub>2</sub>; y; b; b; -H<sub>2</sub>O; b; -NH<sub>2</sub>; y

**Fragment Matches**

| Ion Series | Neutral Losses | Precursor Ions  | Internal Fragments |
|------------|----------------|-----------------|--------------------|
| #1         | b <sup>+</sup> | b <sup>2+</sup> | Seq.               |
| 1          | 114.09134      | 57.54931        | 38.70196 L         |
| 2          | 201.12337      | 101.06532       | 67.71264 S         |
| 3          | 288.15540      | 144.58134       | 96.72332 S         |
| 4          | 401.23948      | 201.12337       | 134.41800 L        |
| 5          | 502.28714      | 251.64721       | 168.10556 T        |
| 6          | 631.33070      | 315.66585       | 211.11476 E        |
| 7          | 732.37141      | 366.69234       | 244.79732 T        |
| 8          | 845.46147      | 423.23438       | 282.49201 I        |
| 9          | 974.50407      | 487.75919       | 326.56521 E        |
| 10         | 1091.52953     | 546.26640       | 344.51336 G        |
| 11         | 1130.59395     | 565.80061       | 377.53817 V        |
| 12         | 1248.62000     | 623.31409       | 416.67648 D        |
| 13         | 1316.65800     | 658.82644       | 439.55762 A        |
| 14         | 1445.70060     | 723.35394       | 482.57172 E        |
| 15         | 1560.71754     | 780.36141       | 526.31420 D        |
| 16         | 1617.74900     | 809.37814       | 539.92119 G        |
| 17         | 1754.80791     | 877.90760       | 585.60749 H        |
| 18         | 1811.83330     | 906.41633       | 604.61644 G        |
| 19         | 1908.88214     | 954.94471       | 636.95556 P        |

**Fragment Spectrum**

10410-KMT-Regensburg-Um-28314-2590-0 raw #11907 RT: 114.8764 min

FTMS, 790.8917@ms04.00, z=+3, Mono m/z=790.36224 Da, MH+=2369.07218 Da, Match Tol=0.05 Da

**Peptide Spectrum Match Identification Details**

Options: Load Save Factory Defaults

Display Options: Charge Detail Level: All

Annotation Threshold: 1.0 % of base peak

Match Tolerances: Match Tolerance: 0.05 Da

Mass analysis: FTMS

Match tolerance: 0.02 Da

Fragmentation: Activation Type: HCD

Ion Series: a, b, c, x, y, z

Neutral Losses: H<sub>2</sub>O, NH<sub>3</sub>, 2H<sub>2</sub>O, 2NH<sub>3</sub>, CO, HCOOH, Methylation, Loss

Other: Incomplete, Precursor, Internal, Fragments, Abbreviations: (P) = H<sub>2</sub>PO, (-O) = H<sub>2</sub>CO

**Peptide Summary**

Sequence: **EGVQKEDIPADLSQVQV**, Charge: +2, Monoisotopic m/z: 968.97766 Da (-0.89 mmu/-0.92 ppm), MH+: 1936.94805 Da, RT: 26.8642 min.

Identified with: **Sequest HT (v1.17); XCorr: 2.81**

Fragment match tolerance used for search: 0.05 Da

Fragments used for search: -H<sub>2</sub>O; y; -NH<sub>2</sub>; y; b; b; -H<sub>2</sub>O; b; -NH<sub>2</sub>; y

**Fragment Matches**

| Ion Series | Neutral Losses | Precursor Ions  | Internal Fragments |
|------------|----------------|-----------------|--------------------|
| #1         | b <sup>+</sup> | b <sup>2+</sup> | Seq.               |
| 1          | 130.04887      | 65.02885        | E                  |
| 2          | 187.07133      | 94.03930        | G                  |
| 3          | 286.13976      | 143.07591       | V                  |
| 4          | 414.18822      | 207.09200       | Q                  |
| 5          | 542.23220      | 271.06038       | K                  |
| 6          | 671.33588      | 336.17158       | E                  |
| 7          | 785.36262      | 393.68026       | D                  |
| 8          | 899.44839      | 452.22708       | I                  |
| 9          | 996.49968      | 498.75346       | P                  |
| 10         | 1093.55242     | 547.27995       | P                  |
| 11         | 1184.60951     | 593.79840       | A                  |
| 12         | 1279.61647     | 640.31187       | D                  |
| 13         | 1392.70064     | 696.35991       | L                  |
| 14         | 1479.73266     | 740.36992       | S                  |
| 15         | 1584.78951     | 797.88333       | D                  |
| 16         | 1722.81808     | 861.91268       | Q                  |
| 17         | 1821.88650     | 913.44689       | V                  |
| 18         |                |                 |                    |

**Fragment Spectrum**

10516-BaPlex-Um-24687-2449-B\_HCD raw #2437 RT: 26.8642 min

FTMS, 968.4830@ms05.00, z=+2, Mono m/z=968.97766 Da, MH+=1936.94805 Da, Match Tol=0.05 Da

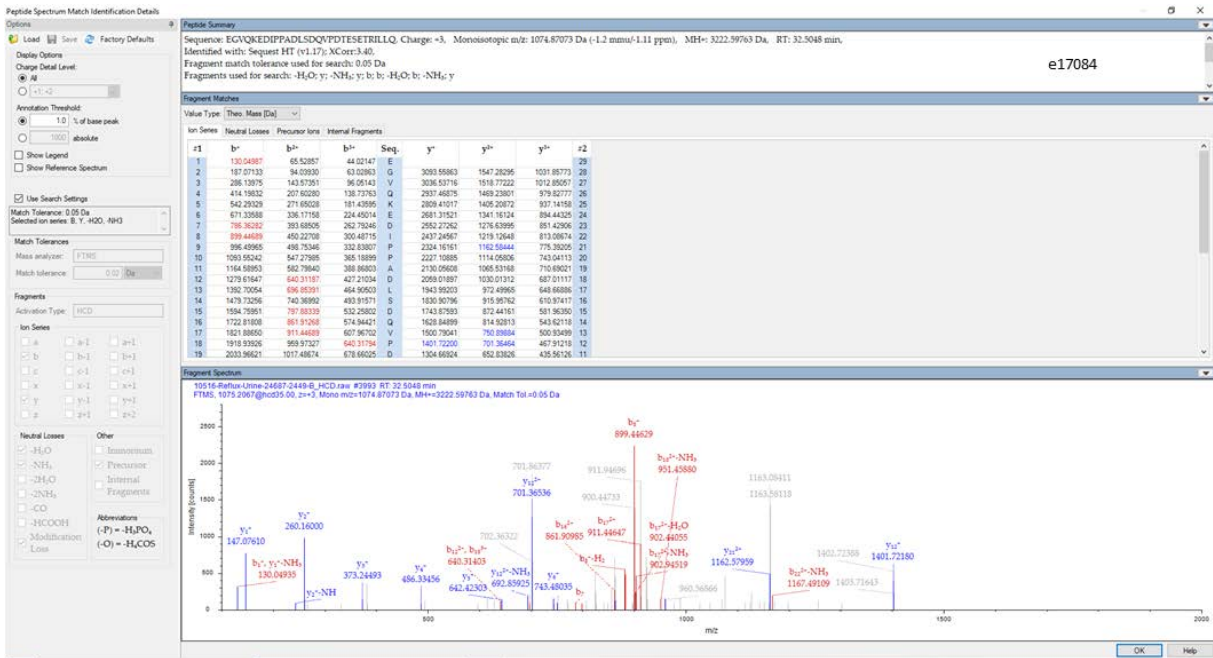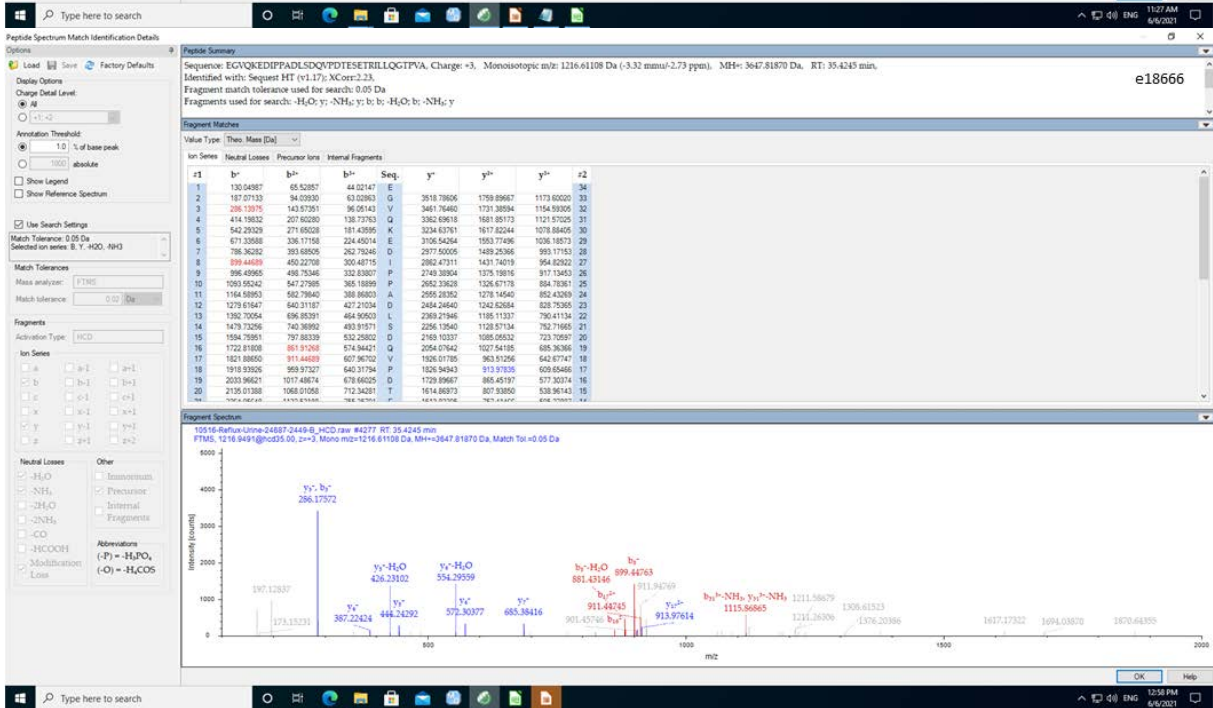



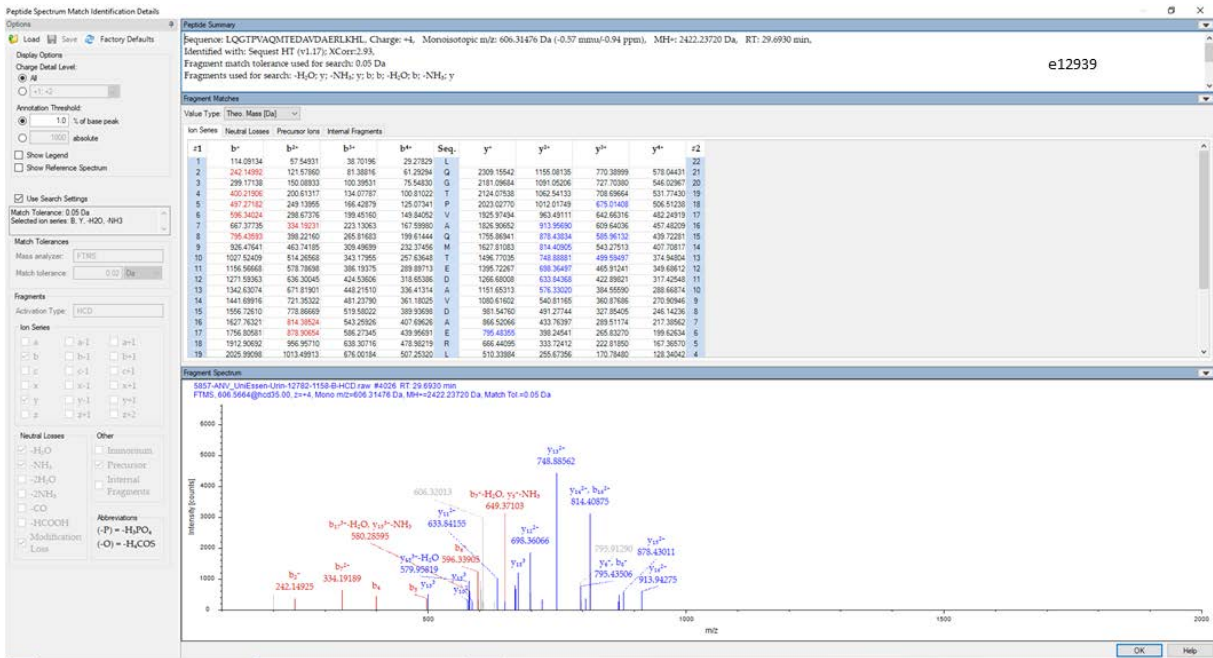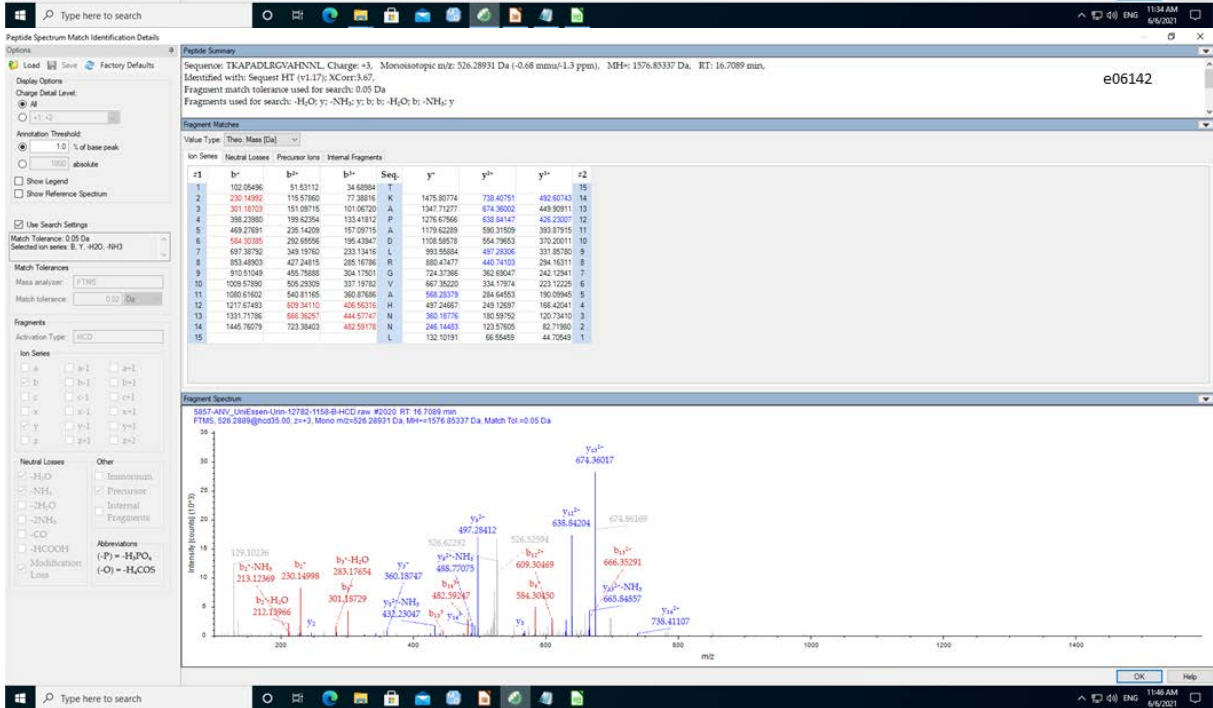

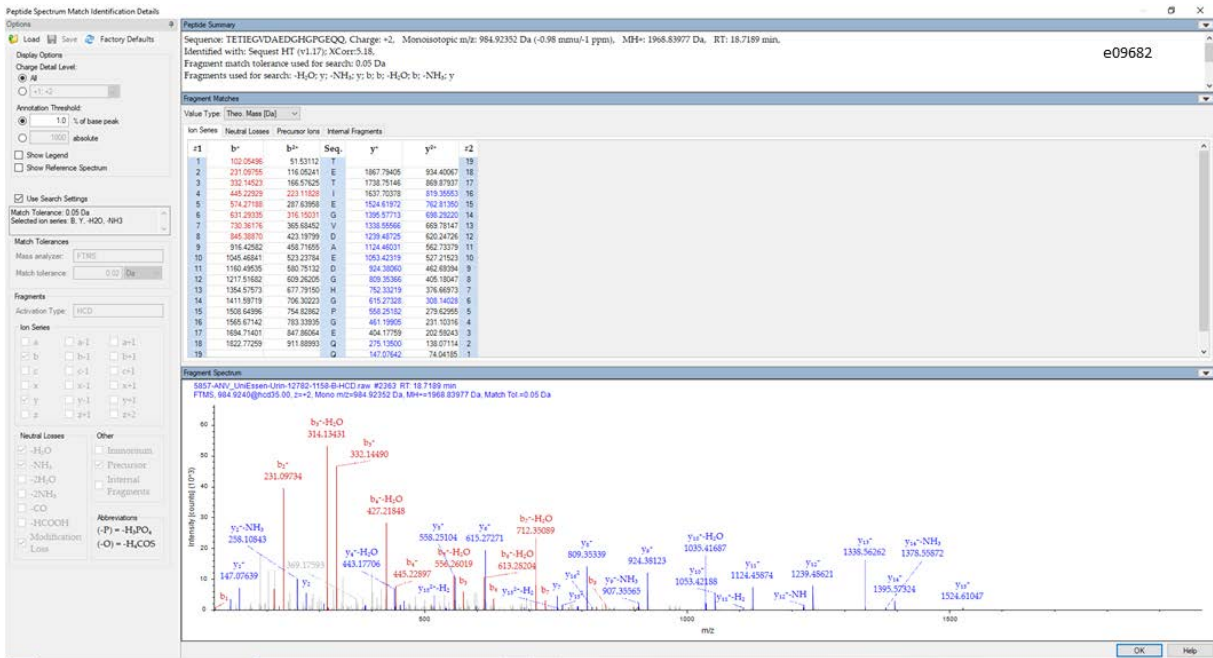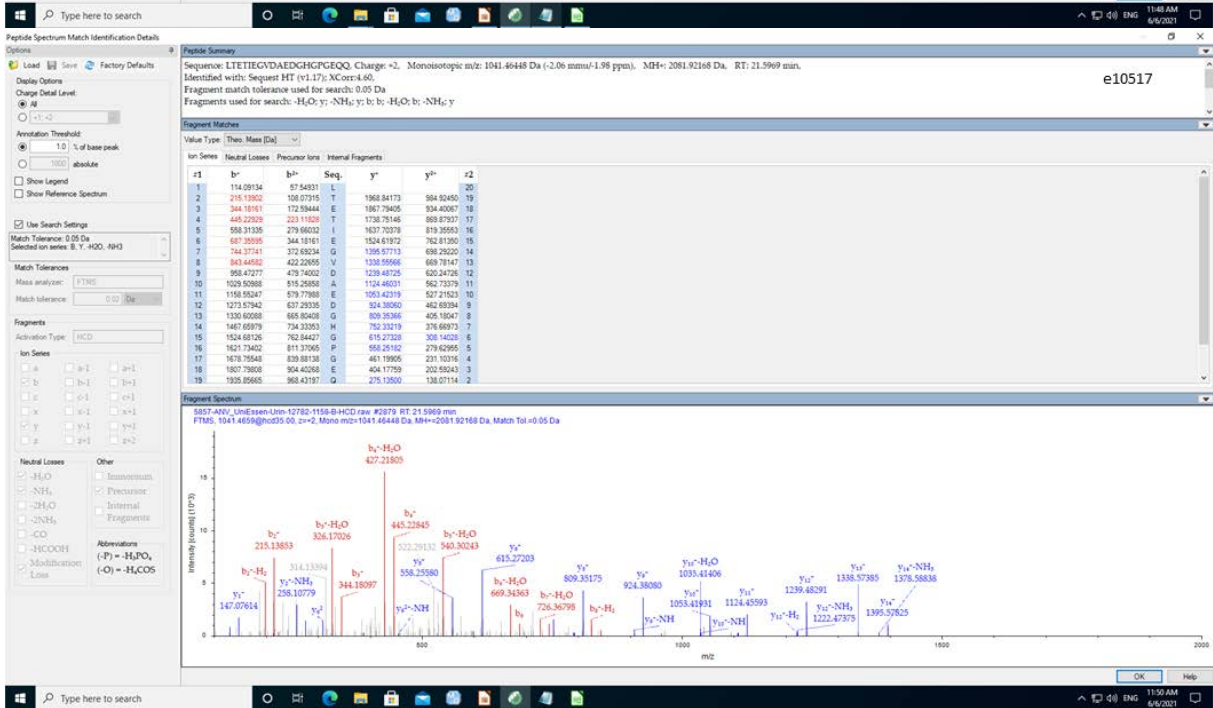

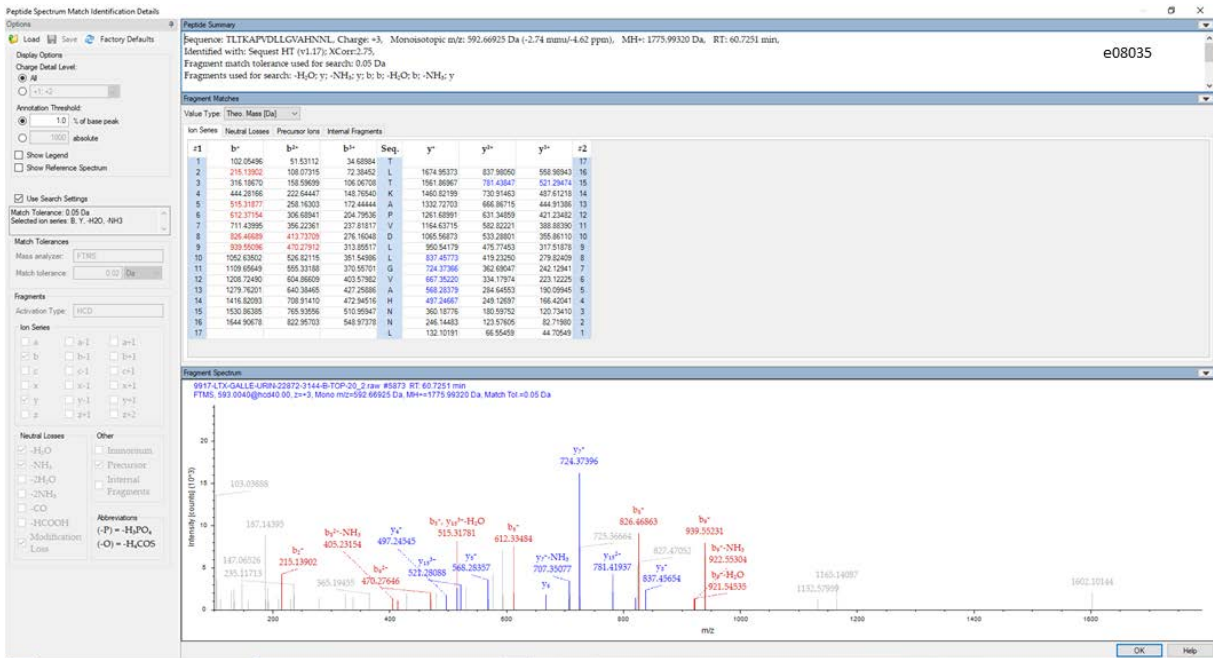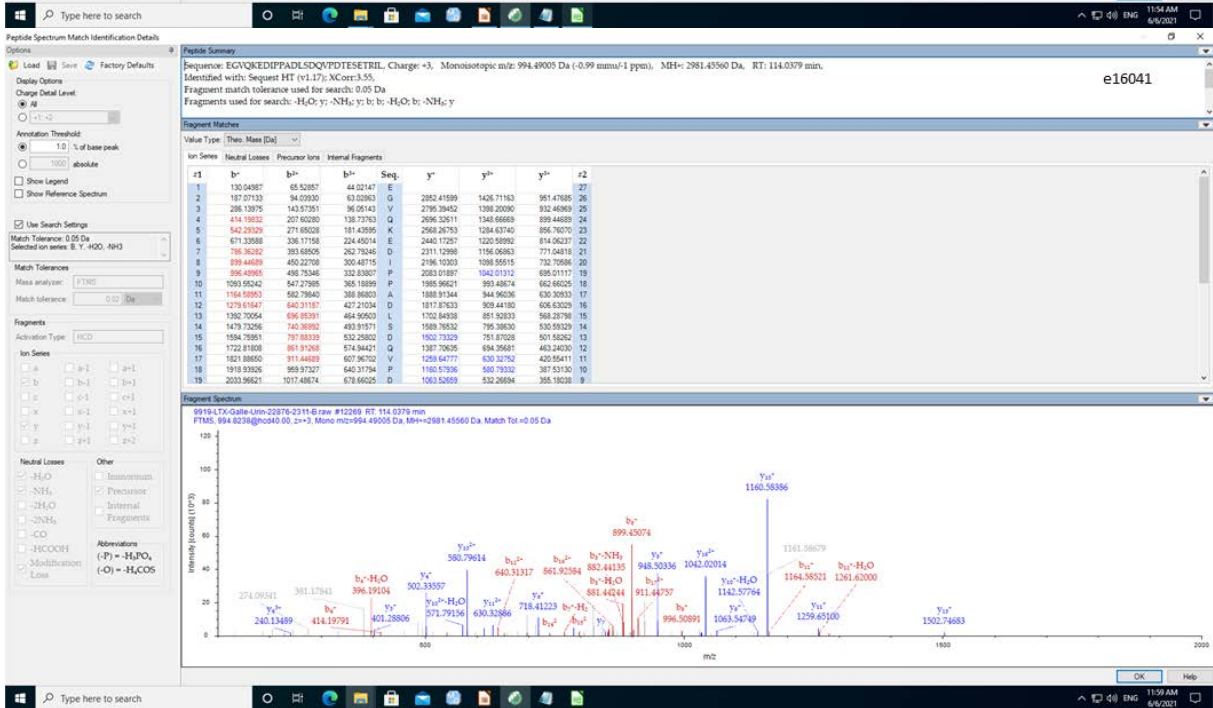

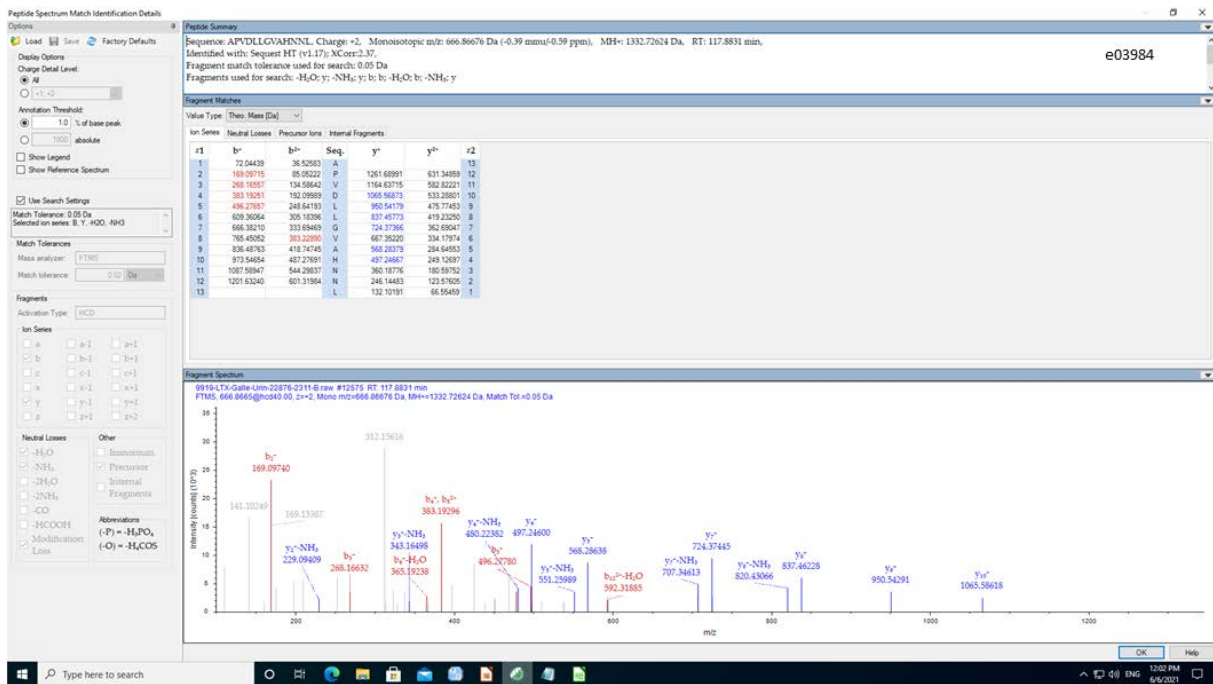

**Supplementary Figure 1:** Tandem mass spectra and assignment of sequences of the 23 complement derived urine peptides detected.



## Supplementary Figure 2

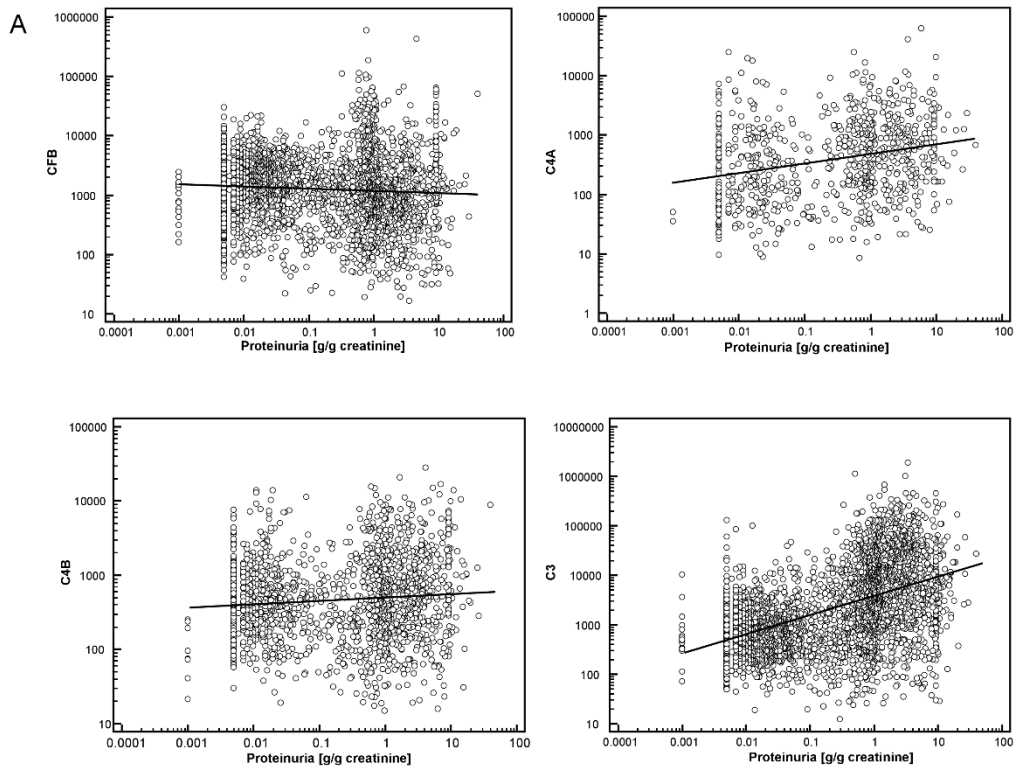

**Supplementary Figure 2:** Association of the combined abundance of complement peptides (from Complement factor B, 4A, 4B and 3) with proteinuria, A) prior and B) after adjustment for proteinuria.

### Supplementary Figure 3

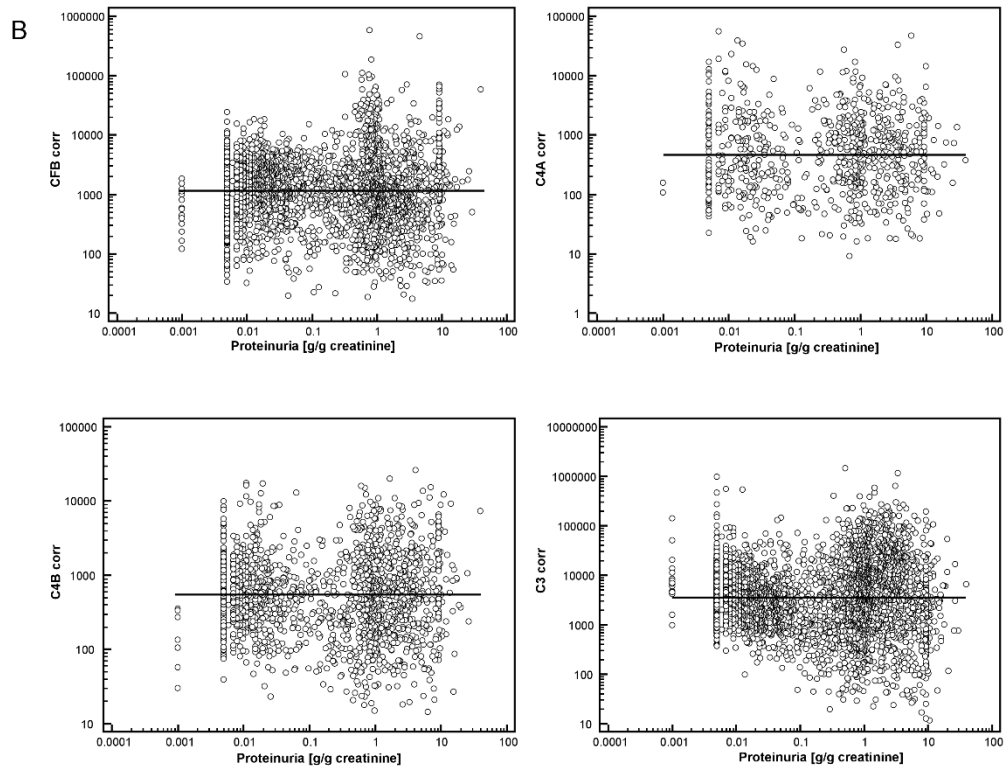

**Supplementary Figure 3:** Association of proteinuria with eGFR in the study population. As expected, a highly significant correlation is detectable.

| N    | disease/condition                  | e13403 | e11594 | e11703 | e12606 | e10517 | e08566 | e09682 | e08161 | e09265 | e06142 | e08035 | e03984 | e00117 | e09429 | e16041 | e17084 | e18666 | e12939 | e14381 | e16109 | e06787 | e08849 | e09686 |
|------|------------------------------------|--------|--------|--------|--------|--------|--------|--------|--------|--------|--------|--------|--------|--------|--------|--------|--------|--------|--------|--------|--------|--------|--------|--------|
| 422  | acute_kidney_injury                | 56,01  | 2,94   | 0,47   | 31,43  | 44,29  | 0,83   | 0,33   | 22,63  | 1,15   | 18,90  | 45,07  | 1,16   | 2,65   | 55,02  | 5,38   | 0,58   | 0,29   | 57,80  | 21,84  | 27,08  | 1,04   | 11,90  | 7,81   |
| 273  | ADPKD                              | 7,13   | 3,81   | 3,66   | 1,62   | 0,80   | 1,96   | 1,23   | 0,66   | 2,16   | 0,35   | 0,26   | 0,20   | 0,57   | 5,34   | 0,82   | 0,97   | 0,90   | 5,74   | 1,48   | 0,37   | 1,39   | 1,15   | 2,20   |
| 8    | amyloidosis                        | 0,00   | 2,89   | 0,29   | 1,43   | 2,96   | 0,26   | 0,36   | 24,43  | 0,36   | 0,00   | 0,00   | 0,00   | 0,00   | 0,00   | 1,51   | 0,06   | 0,00   | 38,01  | 1,15   | 0,00   | 2,33   | 0,00   | 8,90   |
| 8    | atypical_hemolytic_uremic_syndrome | 0,00   | 0,07   | 0,00   | 0,44   | 0,00   | 0,89   | 0,00   | 0,00   | 0,16   | 1,15   | 0,00   | 0,00   | 0,00   | 33,93  | 0,66   | 0,15   | 0,00   | 0,33   | 0,78   | 0,00   | 0,15   | 0,00   | 0,00   |
| 24   | C3_glomerulopathy                  | 0,00   | 0,31   | 0,31   | 0,49   | 4,72   | 0,50   | 3,68   | 5,44   | 0,83   | 5,18   | 14,68  | 0,00   | 2,04   | 293,83 | 0,55   | 0,00   | 0,00   | 60,96  | 7,93   | 0,00   | 1,37   | 5,49   | 2,03   |
| 567  | CAKUT                              | 14,23  | 6,50   | 0,99   | 1,70   | 1,00   | 0,40   | 13,18  | 0,61   | 3,01   | 0,15   | 2,69   | 0,46   | 0,46   | 0,23   | 0,34   | 1,61   | 3,87   | 4,72   | 1,89   | 23,21  | 0,40   | 1,39   | 2,15   |
| 4428 | DiabetesMell_yes                   | 0,31   | 1,72   | 0,51   | 1,59   | 9,58   | 1,43   | 0,77   | 3,31   | 1,82   | 1,42   | 9,11   | 0,75   | 1,75   | 6,69   | 1,76   | 0,71   | 0,84   | 4,54   | 1,37   | 2,23   | 0,96   | 3,01   | 1,28   |
| 1401 | diabetic_nephropathy               | 2,57   | 0,83   | 0,18   | 1,79   | 3,35   | 0,62   | 0,20   | 39,53  | 0,84   | 6,26   | 10,74  | 5,70   | 0,97   | 179,37 | 2,23   | 0,12   | 0,36   | 129,57 | 8,21   | 2,98   | 2,30   | 4,68   | 5,78   |
| 12   | fanconi_syndrom                    | 3,46   | 2,23   | 0,07   | 0,95   | 0,00   | 0,00   | 4,15   | 0,00   | 1,99   | 0,21   | 0,00   | 0,00   | 0,00   | 0,00   | 2,10   | 0,00   | 0,41   | 0,15   | 5,15   | 1,80   | 0,61   | 9,37   | 0,00   |
| 126  | FSGS                               | 2,42   | 1,83   | 0,35   | 5,61   | 4,26   | 0,81   | 1,54   | 25,26  | 1,75   | 7,19   | 64,36  | 1,91   | 3,76   | 50,13  | 3,40   | 0,20   | 0,51   | 206,63 | 5,96   | 150,08 | 1,43   | 4,62   | 9,23   |
| 811  | IgAN                               | 20,24  | 1,68   | 0,56   | 1,59   | 6,29   | 0,78   | 0,75   | 10,81  | 1,11   | 5,16   | 65,72  | 0,56   | 3,11   | 109,19 | 1,67   | 0,30   | 0,09   | 114,80 | 10,21  | 7,02   | 2,40   | 4,70   | 127,85 |
| 50   | MCD                                | 0,00   | 9,41   | 0,82   | 0,50   | 8,54   | 2,08   | 0,45   | 31,91  | 1,19   | 2,18   | 0,00   | 0,00   | 1,47   | 358,95 | 0,32   | 0,07   | 0,00   | 452,90 | 23,43  | 79,50  | 4,10   | 12,80  | 0,94   |
| 113  | MGN                                | 0,86   | 1,68   | 0,22   | 2,72   | 8,56   | 0,96   | 0,61   | 111,32 | 2,05   | 15,72  | 26,65  | 0,36   | 3,13   | 79,38  | 3,01   | 0,04   | 0,00   | 176,52 | 13,61  | 0,36   | 4,34   | 26,57  | 20,77  |
| 66   | Morbus_Fabry                       | 12,18  | 2,66   | 0,10   | 1,02   | 4,02   | 0,86   | 1,99   | 1,42   | 1,11   | 1,33   | 0,00   | 0,67   | 0,52   | 30,88  | 0,54   | 0,85   | 0,26   | 12,56  | 2,94   | 1,27   | 0,73   | 8,63   | 2,04   |
| 50   | MPGN                               | 33,52  | 1,86   | 2,19   | 12,69  | 11,41  | 0,94   | 22,91  | 16,14  | 1,61   | 7,13   | 38,93  | 0,24   | 5,13   | 56,08  | 2,85   | 0,04   | 0,21   | 82,29  | 6,61   | 3,56   | 2,13   | 4,43   | 3,20   |
| 104  | hypertensive_nephrosclerosis       | 5,89   | 1,68   | 0,11   | 5,37   | 34,01  | 0,43   | 0,24   | 1,36   | 0,61   | 2,11   | 6,58   | 0,00   | 1,75   | 25,74  | 13,37  | 0,33   | 0,92   | 35,43  | 2,77   | 0,16   | 0,73   | 22,64  | 4,10   |
| 127  | nephrotic_syndrom                  | 45,54  | 2,66   | 2,58   | 1,39   | 5,90   | 2,42   | 15,89  | 104,96 | 7,52   | 21,36  | 33,29  | 4,40   | 3,10   | 353,70 | 0,84   | 0,94   | 0,33   | 256,27 | 20,75  | 120,66 | 2,69   | 211,49 | 2,70   |
| 2300 | NTx                                | 17,16  | 0,94   | 0,26   | 3,40   | 1,87   | 0,50   | 1,02   | 5,60   | 0,71   | 3,63   | 32,61  | 0,77   | 3,33   | 8,45   | 1,38   | 0,67   | 0,21   | 11,72  | 3,75   | 2,87   | 1,40   | 7,59   | 2,91   |
| 20   | SLE                                | 0,00   | 0,04   | 0,00   | 0,99   | 0,00   | 0,34   | 0,00   | 0,00   | 0,48   | 0,00   | 0,00   | 0,00   | 0,11   | 0,00   | 1,81   | 0,08   | 4,83   | 0,00   | 0,56   | 0,00   | 0,33   | 0,00   | 0,00   |
| 94   | SLE_nephritis                      | 1,65   | 1,44   | 1,18   | 2,06   | 6,63   | 0,48   | 0,21   | 9,48   | 1,51   | 3,96   | 54,33  | 4,72   | 0,52   | 71,33  | 3,01   | 0,19   | 3,73   | 131,44 | 5,07   | 1,17   | 1,10   | 7,32   | 7,77   |
| 159  | vaskulitis                         | 31,61  | 0,47   | 0,05   | 16,78  | 6,82   | 0,33   | 0,23   | 2,89   | 0,25   | 1,47   | 54,30  | 0,04   | 7,60   | 33,40  | 6,93   | 0,25   | 1,37   | 36,48  | 2,97   | 6,88   | 0,68   | 3,13   | 9,00   |
| 4864 | normal_control                     | 1,00   | 1,00   | 1,00   | 1,00   | 1,00   | 1,00   | 1,00   | 1,00   | 1,00   | 1,00   | 1,00   | 1,00   | 1,00   | 1,00   | 1,00   | 1,00   | 1,00   | 1,00   | 1,00   | 1,00   | 1,00   | 1,00   | 1,00   |

**Supplementary Table 1** Relative abundance of all 23 collagen derived peptides, listed per disease group, normalized to the normal controls.
